# Supplementary material for: A Comprehensive Investigation into the Crystallology, Molecule, and Quantum Chemistry Properties of Two New Hydrous Long-Chain Dibasic Ammonium Salts CnH2n+8N2O6 (n = 35 and 37)
Source: MDPI journal article supplement (doi:10.3390/ijms24065467), 2023-03-13
Supplement: s1 [file s1]

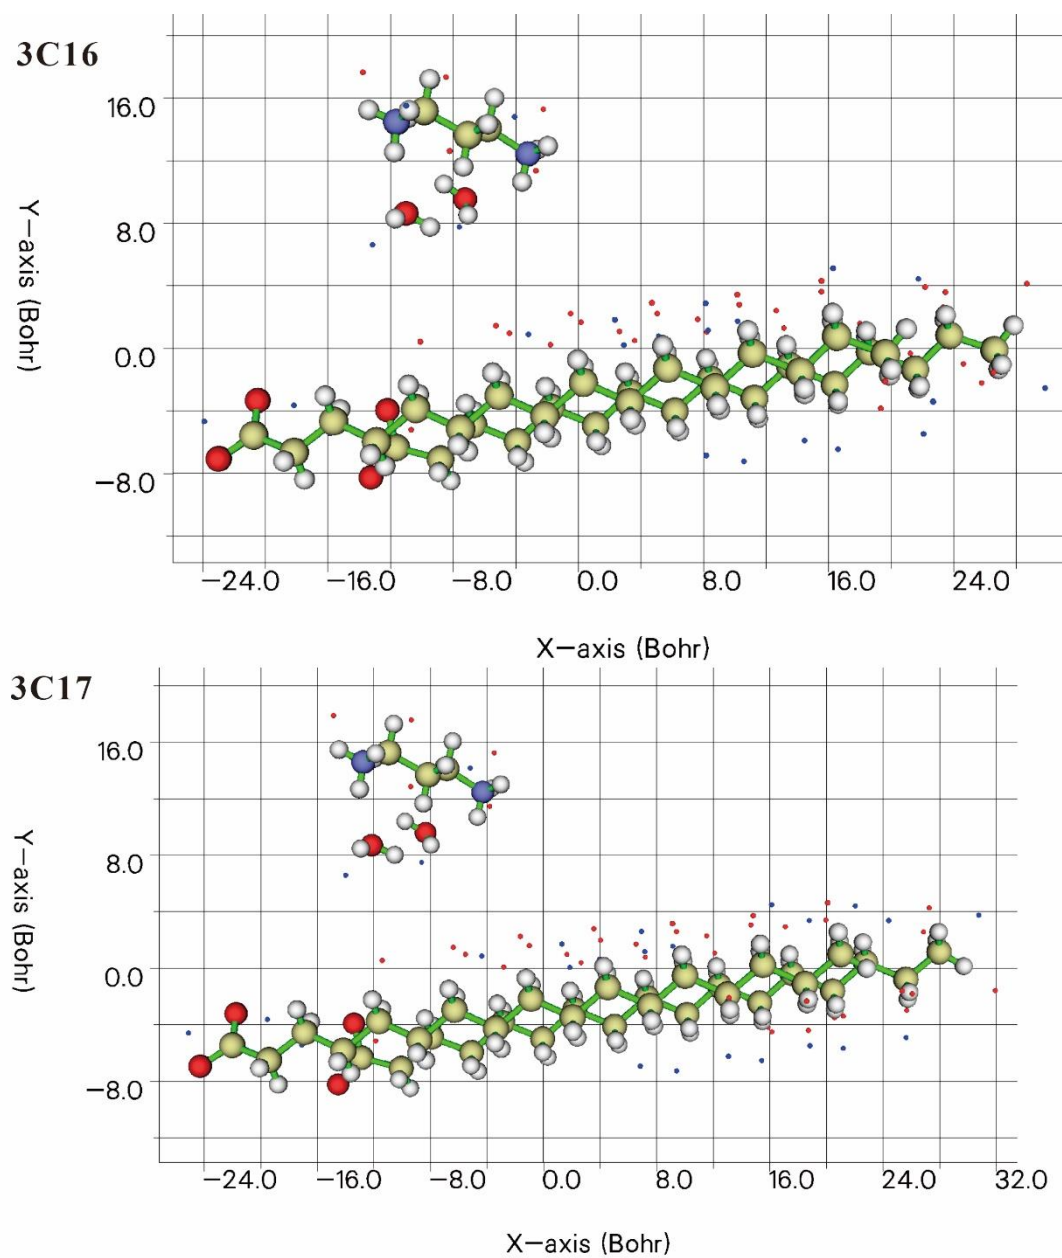

Figure S1. Molecular surface electrostatic potential distribution of 3C16 and 3C17.

**Table S1.** Void volumes, surface areas and void volumes as a percentage of total unit cell volume for different choices of isovalue for 3C16 and 3C17.

| Molecule | Isovalue/au | Volume/Å <sup>3</sup> | Surface area/Å <sup>2</sup> | % of cell volume |
|----------|-------------|-----------------------|-----------------------------|------------------|
| 3C16     | 0.0003      | 0.50                  | 5.81                        | 0.03             |
|          | 0.0005      | 10.44                 | 64.82                       | 0.53             |
|          | 0.0008      | 37.65                 | 167.71                      | 1.92             |
|          | 0.001       | 57.51                 | 228.3                       | 2.93             |
|          | 0.002       | 214.46                | 785.67                      | 10.94            |
| 3C17     | 0.0003      | 0.17                  | 2.09                        | 0.01             |
|          | 0.0005      | 5.07                  | 38.55                       | 0.24             |
|          | 0.0008      | 30.3                  | 157.41                      | 1.45             |
|          | 0.001       | 52.49                 | 250.69                      | 2.52             |
|          | 0.002       | 248.87                | 912.08                      | 11.93            |

**Table S2.** Hirshfeld contact surfaces and derived ‘random contact’ and ‘enrichment ratios’ for the 3C16 crystal.

| Atoms      | H    | O    | C   | N          |
|------------|------|------|-----|------------|
| H          | 79.4 | 8.8  | 0.4 | Contacts   |
| O          | 10.6 | 0.2  | –   | (%)        |
| C          | 0.5  | –    | –   | –          |
| N          | 0    | –    | –   | –          |
| Surface(%) | 90.5 | 9.0  | 0.4 | –          |
| H          | 81.9 | 7.4  | 0.2 | Contacts   |
| O          | 8.9  | 0.8  | –   | Random     |
| C          | 0.6  | –    | –   | (%)        |
| N          | 0    | –    | –   | –          |
| H          | 0.97 | 1.19 | 2.0 | Enrichment |
| O          | 1.19 | 0.25 | –   | –          |
| C          | 0.83 | –    | –   | –          |
| N          | 0    | –    | –   | –          |

**Table S3.** Hirshfeld contact surfaces and derived ‘random contact’ and ‘enrichment ratios’ for the 3C17 crystal.

| Atoms      | H    | O    | C    | N          |
|------------|------|------|------|------------|
| H          | 80.0 | 8.5  | 0.4  | Contacts   |
| O          | 10.3 | 0.2  | –    | (%)        |
| C          | 0.4  | –    | –    | –          |
| N          | 0    | –    | –    | –          |
| Surface(%) | 90.7 | 8.8  | 0.5  | –          |
| H          | 82.3 | 7.2  | 0.45 | Contacts   |
| O          | 8.7  | 0.8  | –    | Random     |
| C          | 0.45 | –    | –    | (%)        |
| N          | 0    | –    | –    | –          |
| H          | 0.97 | 1.18 | 0.89 | Enrichment |
| O          | 1.18 | 0.25 | –    | –          |
| C          | 0.89 | –    | –    | –          |
| N          | –    | –    | –    | –          |

**Table S4.** The electrostatic potential distribution on the molecular surface of 3C16 (the data with \* indicates the extreme point).

| Number of<br>surface minima | a.u.            | eV              | kcal/mol        | X/Y/Z coordinate(Angstrom) |                 |                 |
|-----------------------------|-----------------|-----------------|-----------------|----------------------------|-----------------|-----------------|
| 1                           | -0.16453        | -4.47702        | -103.243        | -11.2868                   | -2.02493        | -0.23548        |
| 2                           | -0.17027        | -4.63317        | -106.844        | -8.72145                   | -1.60206        | -1.2858         |
| <b>*3</b>                   | <b>-0.18087</b> | <b>-4.92175</b> | <b>-113.498</b> | <b>-7.75474</b>            | <b>-2.55052</b> | <b>-2.37115</b> |
| 4                           | -0.02438        | -0.66343        | -15.299         | -6.35988                   | 3.411512        | -1.94315        |
| 5                           | 0.154834        | 4.213252        | 97.15999        | -4.65438                   | 7.243617        | 4.013048        |
| 6                           | -0.02839        | -0.77248        | -17.8137        | -3.8894                    | 4.060429        | -5.12827        |
| 7                           | 0.131806        | 3.586613        | 82.70933        | -1.67138                   | 7.080439        | 2.231581        |
| 8                           | 0.008044        | 0.218889        | 5.047709        | -1.29557                   | 0.681204        | 1.492379        |
| 9                           | 0.005605        | 0.152513        | 3.517026        | 0.000434                   | 0.001186        | -0.60823        |
| 10                          | 0.013988        | 0.380633        | 8.777612        | 1.270841                   | 1.117332        | 1.878849        |
| 11                          | 0.013392        | 0.364421        | 8.403752        | 1.533637                   | 0.31979         | 0.159183        |
| 12                          | 0.005996        | 0.163173        | 3.762859        | 2.637313                   | 0.520624        | -2.45775        |
| 13                          | -0.0015         | -0.04087        | -0.9424         | 3.929375                   | -2.81683        | 2.71099         |
| 14                          | 0.013188        | 0.358868        | 8.275706        | 3.939541                   | 1.602784        | 2.050828        |
| 15                          | 0.015495        | 0.421627        | 9.722963        | 4.078786                   | 0.770223        | 0.428281        |
| 16                          | 0.007731        | 0.210363        | 4.851096        | 5.118993                   | 1.002794        | -2.08478        |
| 17                          | -0.00279        | -0.07603        | -1.75324        | 5.270422                   | -3.3381         | -1.28522        |
| 18                          | 0.001694        | 0.046096        | 1.062991        | 6.761744                   | -2.35995        | 2.986289        |
| 19                          | 0.010461        | 0.284664        | 6.564516        | 7.662142                   | 2.63332         | 2.302381        |
| 20                          | -0.00043        | -0.01171        | -0.27009        | 8.177383                   | -2.94931        | -1.1422         |
| 21                          | 0.00272         | 0.07402         | 1.706946        | 10.46661                   | -1.22758        | 3.099985        |
| 22                          | 0.000575        | 0.015647        | 0.360817        | 10.79381                   | -2.45708        | -0.8996         |
| 23                          | 0.004376        | 0.119074        | 2.745905        | 10.71045                   | 2.33813         | -1.40719        |
| 24                          | -0.00049        | -0.01324        | -0.30526        | 14.46594                   | -1.02014        | -0.51419        |
| Number of<br>surface maxima | a.u.            | eV              | kcal/mol        | X/Y/Zcoordinate(Angstrom)  |                 |                 |
| 1                           | 0.174084        | 4.737079        | 109.2397        | -6.24712                   | 8.491867        | 1.227791        |
| 2                           | -0.0646         | -1.75798        | -40.54          | -4.96487                   | -2.28594        | -0.26814        |
| 3                           | -0.00379        | -0.10307        | -2.37695        | -4.37301                   | 0.499905        | 2.836129        |
| 4                           | 0.163501        | 4.449091        | 102.5986        | -3.95133                   | 8.562197        | -0.84213        |
| 5                           | 0.168485        | 4.584708        | 105.726         | -3.54038                   | 6.048605        | 2.611593        |
| 6                           | 0.014768        | 0.401862        | 9.267171        | -2.17544                   | 0.961225        | 2.88742         |
| 7                           | 0.009981        | 0.271603        | 6.263316        | -1.90906                   | 0.695334        | 0.769408        |
| 8                           | 0.171845        | 4.676127        | 107.8341        | -1.11462                   | 5.5864          | 0.633291        |
| <b>*9</b>                   | <b>0.176002</b> | <b>4.789245</b> | <b>110.4427</b> | <b>-1.01468</b>            | <b>7.709102</b> | <b>-2.40349</b> |
| 10                          | 0.007469        | 0.20325         | 4.68706         | -0.7266                    | 0.301428        | -0.90077        |
| 11                          | 0.02187         | 0.59511         | 13.72357        | -0.00455                   | 1.318212        | 3.097962        |
| 12                          | 0.020062        | 0.545926        | 12.58937        | 0.249353                   | 1.020814        | 0.699309        |

|    |          |          |          |          |          |          |
|----|----------|----------|----------|----------|----------|----------|
| 13 | 0.016749 | 0.455752 | 10.5099  | 1.397522 | 0.714272 | -0.63209 |
| 14 | 0.008902 | 0.242232 | 5.586006 | 1.878454 | 0.35995  | -3.47918 |
| 15 | 0.022175 | 0.603413 | 13.91506 | 2.339536 | 1.63042  | 3.454155 |
| 16 | 0.02077  | 0.565185 | 13.0335  | 2.544838 | 1.286011 | 0.626853 |
| 17 | 0.017867 | 0.486175 | 11.21146 | 3.79263  | 1.090075 | -0.38668 |
| 18 | 0.013111 | 0.356769 | 8.227294 | 4.20413  | 0.624539 | -3.5348  |
| 19 | 0.020176 | 0.54902  | 12.66071 | 4.763124 | 1.869393 | 3.927882 |
| 20 | 0.018522 | 0.504011 | 11.62277 | 5.015043 | 1.548659 | 0.572946 |
| 21 | 0.016798 | 0.457102 | 10.54103 | 6.177074 | 1.367294 | 0.016231 |
| 22 | 0.014252 | 0.387822 | 8.9434   | 6.696013 | 0.756833 | -3.57825 |
| 23 | 0.018569 | 0.505275 | 11.65193 | 7.137496 | 2.261866 | 4.170209 |
| 24 | 0.016862 | 0.458836 | 10.58101 | 7.487066 | 1.947482 | 0.644759 |
| 25 | 0.010723 | 0.291781 | 6.728637 | 8.569841 | -1.60058 | -3.35366 |
| 26 | 0.015556 | 0.4233   | 9.761539 | 8.838187 | -0.55271 | 4.94698  |
| 27 | 0.013597 | 0.369987 | 8.532115 | 9.128449 | 0.916611 | -3.49573 |
| 28 | 0.013782 | 0.37502  | 8.64817  | 9.206488 | -1.54296 | 1.176996 |
| 29 | 0.01823  | 0.496064 | 11.43952 | 10.31732 | 2.08734  | 2.568623 |
| 30 | 0.011121 | 0.302609 | 6.978333 | 10.68749 | -0.03747 | -3.00227 |
| 31 | 0.01146  | 0.311839 | 7.191191 | 11.21573 | -1.20705 | -3.09451 |
| 32 | 0.014313 | 0.389483 | 8.98171  | 11.19676 | 1.932719 | 0.807084 |
| 33 | 0.013069 | 0.355635 | 8.201142 | 11.76762 | 1.432635 | -3.22327 |
| 34 | 0.012543 | 0.341305 | 7.870698 | 12.33976 | -0.36814 | -2.74104 |
| 35 | 0.013009 | 0.35398  | 8.162988 | 12.53867 | -0.46368 | 1.305257 |
| 36 | 0.012624 | 0.343527 | 7.921918 | 12.91783 | -0.97854 | -2.75194 |
| 37 | 0.015191 | 0.413358 | 9.532272 | 13.98223 | 2.190865 | -0.89459 |

---

**Table S5.** The electrostatic potential distribution on the molecular surface of 3C17 (the data with \* indicates the extreme point).

| Number of<br>surface minima | a.u.            | eV              | kcal/mol        | X/Y/Z coordinate(Angstrom) |                 |                 |
|-----------------------------|-----------------|-----------------|-----------------|----------------------------|-----------------|-----------------|
| 1                           | -0.1636         | -4.45181        | -102.661        | -11.9085                   | -1.99734        | -0.24348        |
| 2                           | -0.1685         | -4.58513        | -105.736        | -9.40271                   | -1.59916        | -1.29443        |
| <b>*3</b>                   | <b>-0.17935</b> | <b>-4.88029</b> | <b>-112.542</b> | <b>-8.38295</b>            | <b>-2.55955</b> | <b>-2.39748</b> |
| 4                           | -0.02899        | -0.78883        | -18.1908        | -6.79626                   | 3.392991        | -2.03949        |
| 5                           | -0.03213        | -0.87436        | -20.1633        | -4.41309                   | 3.92474         | -5.06832        |
| 6                           | 0.132711        | 3.611239        | 83.27722        | -2.19178                   | 6.814799        | 2.19633         |
| 7                           | 0.007183        | 0.195463        | 4.507477        | -1.85527                   | 0.651875        | 1.34083         |
| 8                           | 0.013252        | 0.360613        | 8.315941        | 0.79948                    | 1.058245        | 1.744755        |
| 9                           | 0.012426        | 0.338122        | 7.797281        | 1.04878                    | 0.244777        | 0.143264        |
| 10                          | 0.005214        | 0.141886        | 3.271971        | 2.075822                   | 0.460598        | -2.52293        |
| 11                          | -0.00153        | -0.04151        | -0.95732        | 3.349939                   | -2.88238        | 2.710862        |
| 12                          | 0.012335        | 0.335653        | 7.740345        | 3.41711                    | 1.473553        | 1.984267        |
| 13                          | 0.014612        | 0.397623        | 9.169403        | 3.567028                   | 0.785782        | 0.521668        |
| 14                          | 0.007135        | 0.194164        | 4.477527        | 4.62557                    | 0.913192        | -2.23322        |
| 15                          | -0.00323        | -0.08788        | -2.02662        | 4.720756                   | -3.37861        | -1.33302        |
| 16                          | 0.001021        | 0.027785        | 0.640734        | 6.195344                   | -2.54961        | 2.910019        |
| 17                          | -0.0003         | -0.00818        | -0.18872        | 7.630265                   | -3.00132        | -1.07379        |
| 18                          | 0.008825        | 0.240127        | 5.537476        | 7.654374                   | 2.347407        | 2.249425        |
| 19                          | 0.002344        | 0.063774        | 1.470674        | 8.812201                   | -2.19961        | 3.029691        |
| 20                          | 0.005134        | 0.13971         | 3.221789        | 9.359405                   | 1.814437        | -1.83944        |
| 21                          | 0.000274        | 0.007457        | 0.171956        | 10.41686                   | -2.5685         | -0.93143        |
| 22                          | 0.003978        | 0.108234        | 2.495947        | 10.94275                   | 2.321264        | -1.72689        |
| 23                          | 0.004883        | 0.132862        | 3.063862        | 11.38995                   | 1.837437        | 2.798236        |
| 24                          | 0.00035         | 0.009532        | 0.219819        | 12.52812                   | -2.18248        | -0.67011        |
| 25                          | 0.001407        | 0.038292        | 0.88303         | 15.11443                   | 2.002805        | -1.16266        |
| Number of<br>surface maxima | a.u.            | eV              | kcal/mol        | X/Y/Z coordinate(Angstrom) |                 |                 |
| <b>*1</b>                   | <b>0.176608</b> | <b>4.805753</b> | <b>110.8234</b> | <b>-6.76955</b>            | <b>8.628194</b> | <b>1.322795</b> |
| 2                           | -0.06353        | -1.72885        | -39.8682        | -5.55241                   | -2.26965        | -0.25296        |
| 3                           | -0.00364        | -0.09907        | -2.28449        | -4.99689                   | 0.544983        | 2.830868        |
| 4                           | 0.163558        | 4.450638        | 102.6342        | -4.38887                   | 8.69457         | -0.79437        |
| 5                           | 0.170789        | 4.647402        | 107.1717        | -4.08265                   | 6.180803        | 2.686758        |
| 6                           | 0.014863        | 0.40445         | 9.326856        | -2.69532                   | 0.977395        | 2.901049        |
| 7                           | 0.008834        | 0.240387        | 5.543464        | -2.43156                   | 0.69611         | 0.793618        |
| 8                           | 0.170751        | 4.646375        | 107.148         | -1.63276                   | 5.651626        | 0.61141         |
| 9                           | 0.174342        | 4.744086        | 109.4013        | -1.63689                   | 7.709999        | -2.51374        |
| 10                          | 0.006046        | 0.164511        | 3.793715        | -1.22933                   | 0.221964        | -0.80932        |
| 11                          | 0.021766        | 0.592286        | 13.65846        | -0.51993                   | 1.327431        | 3.065997        |

|    |          |          |          |          |          |          |
|----|----------|----------|----------|----------|----------|----------|
| 12 | 0.019051 | 0.518403 | 11.95468 | -0.30384 | 0.989092 | 0.661324 |
| 13 | 0.015987 | 0.435018 | 10.03176 | 0.935921 | 0.66741  | -0.63873 |
| 14 | 0.007909 | 0.215207 | 4.962794 | 1.408729 | 0.297469 | -3.50218 |
| 15 | 0.021901 | 0.595958 | 13.74313 | 1.851407 | 1.5785   | 3.453887 |
| 16 | 0.019796 | 0.53869  | 12.4225  | 2.083969 | 1.173466 | 0.506253 |
| 17 | 0.017339 | 0.471827 | 10.8806  | 3.295408 | 1.019625 | -0.40342 |
| 18 | 0.012472 | 0.339367 | 7.826008 | 3.705203 | 0.492148 | -3.65773 |
| 19 | 0.0198   | 0.538797 | 12.42496 | 4.34317  | 1.746123 | 3.899713 |
| 20 | 0.017859 | 0.48597  | 11.20674 | 4.626758 | 1.450578 | 0.520384 |
| 21 | 0.016343 | 0.444719 | 10.25548 | 5.684332 | 1.302464 | -0.12283 |
| 22 | 0.013652 | 0.371493 | 8.566835 | 6.071878 | -0.56799 | 4.761854 |
| 23 | 0.013514 | 0.367724 | 8.479921 | 6.196842 | 0.638312 | -3.71757 |
| 24 | 0.017652 | 0.480348 | 11.07711 | 6.886938 | 2.002906 | 4.156496 |
| 25 | 0.015739 | 0.428274 | 9.87624  | 7.127111 | 1.673343 | 0.546919 |
| 26 | 0.011124 | 0.30271  | 6.980666 | 7.79932  | -1.88915 | 0.829915 |
| 27 | 0.010453 | 0.284429 | 6.559105 | 8.077398 | -1.99989 | -3.40163 |
| 28 | 0.015267 | 0.415426 | 9.579951 | 8.311999 | 1.615191 | 0.196835 |
| 29 | 0.013359 | 0.363512 | 8.382801 | 8.484407 | -0.6657  | 4.946163 |
| 30 | 0.013244 | 0.360375 | 8.310448 | 8.718766 | 0.760336 | -3.68674 |
| 31 | 0.011355 | 0.30899  | 7.125477 | 9.001618 | -1.83473 | 0.980333 |
| 32 | 0.017944 | 0.488273 | 11.25985 | 9.238059 | 2.406352 | 4.163059 |
| 33 | 0.016078 | 0.437508 | 10.08918 | 9.627346 | 1.840446 | 0.643807 |
| 34 | 0.011265 | 0.306531 | 7.068774 | 10.15856 | -1.34879 | 1.054332 |
| 35 | 0.010909 | 0.296838 | 6.845255 | 10.41396 | -1.65276 | -3.23827 |
| 36 | 0.012608 | 0.343073 | 7.911455 | 11.39364 | 1.055675 | -3.5221  |
| 37 | 0.015235 | 0.414555 | 9.559876 | 11.73779 | -0.41798 | 3.296805 |
| 38 | 0.011526 | 0.313649 | 7.232919 | 12.41312 | -0.59844 | 1.258983 |
| 39 | 0.010665 | 0.290214 | 6.6925   | 12.92971 | -1.37426 | -2.92657 |
| 40 | 0.014306 | 0.389288 | 8.977193 | 13.09965 | 2.255691 | 0.572747 |
| 41 | 0.013745 | 0.374019 | 8.62508  | 13.57756 | 1.403746 | -3.22823 |
| 42 | 0.013283 | 0.361453 | 8.335319 | 15.52388 | -0.56621 | -0.42381 |

---
